# Supplementary material for: The Magnitude of Health and Health Services Problems Linked to COVID-19 in Yemen: a mixed‑method study
Source: Research Square preprint supplement (doi:10.21203/rs.3.rs-5427371/v1), 2025-10-31

Supplementary **Table 4.** Analysis of knowledge gap checklist.

| **Code** | **Measures** | **1** | **2** | **3** | **4** | **5** |
| --- | --- | --- | --- | --- | --- | --- |
| **Very high Importance** | **Importance** | **Moderate importance** | **Low importance** | **Not importance** |
| 1 | Announcement of emergency | 31 | 1 |  |  |  |
| 2 | Launching a public health website for guidelines and information | 25 | 6 | 1 |  |  |
| 3 | Establishing a “Coronavirus Task Force” or Expert board | 30 | 1 | 1 |  |  |
| 4 | Control the speed of fake news and false information | 28 | 4 |  |  |  |
| 5 | Conducting training programs | 30 | 2 |  |  |  |
| 6 | Fine for violating Quarantine, isolation, social distancing, or any other Govt. regulation | 20 | 10 | 1 |  | 1 |
| 7 | The sanction was given for persons with speculative hoarding and resaling | 29 | 2 | 1 |  |  |
| 8 | Encourage NGOs to raise funds and food banks for poor and vulnerable households | 22 | 10 |  |  |  |
| 9 | Government financial assistance for citizens /taxpayer | 21 | 8 | 2 |  | 1 |
| 10 | Equal protection for immigrants/ foreigners | 25 | 7 |  |  |  |
| 11 | Exemption /reduction/Extension for paying tax or reduced interest rate | 29 | 1 | 2 |  |  |
| 12 | Regulation and Stabilization of food prices and daily necessities | 18 | 12 | 1 | 1 |  |
| 13 | Enable open access to surveillance data that will allow independent analysis by the researcher | 27 | 5 |  |  |  |
| 14 | A regular survey of public knowledge, awareness, and practice regarding the whole-of-government response to the pandemic | 16 | 10 | 3 | 2 | 1 |
| 15 | Develop dashboards, repositories, and infographics to graphically visualize information and data | 29 | 2 | 1 |  |  |
| 16 | Use social media for community-based research focusing on knowledge, attitudes, and practice | 29 | 3 |  |  |  |
| 8 | Encourage NGOs to raise funds and food banks for poor and vulnerable households | 22 | 10 |  |  |  |
| 9 | Government financial assistance for citizens /taxpayer | 21 | 8 | 2 |  | 1 |
| 10 | Equal protection for immigrants/ foreigners | 25 | 7 |  |  |  |
| 11 | Exemption /reduction/Extension for paying tax or reduced interest rate | 29 | 1 | 2 |  |  |
| 12 | Regulation and Stabilization of food prices and daily necessities | 18 | 12 | 1 | 1 |  |
| 13 | Enable open access to surveillance data that will allow independent analysis by the researcher | 27 | 5 |  |  |  |
| 14 | A regular survey of public knowledge, awareness, and practice regarding the whole-of-government response to the pandemic | 16 | 10 | 3 | 2 | 1 |
| 15 | Develop dashboards, repositories, and infographics to graphically visualize information and data | 29 | 2 | 1 |  |  |
| 16 | Use social media for community-based research focusing on knowledge, attitudes, and practice | 29 | 3 |  |  |  |
| 55 | An epidemiological investigation using the F0-F5 evaluation system | 28 | 3 | 1 |  |  |
| 56 | Using contact-tracing app | 26 | 6 |  |  |  |
| 57 | Using medical declaration when having respiratory symptoms or close contact with the new confirmed patient | 25 | 6 |  | 1 |  |
| 58 | Isolation for all confirmed cases (F0) | 28 | 1 |  |  | 3 |
| 59 | Disinfect the workplace place of the new detected patient | 18 | 11 |  | 1 | 2 |
| 60 | Closure of the workplace place of the new detected patient | 24 | 7 | 1 |  |  |
| 61 | The Isolation/quarantine for patients with respiratory symptoms (flu-like illness) | 29 | 2 |  |  | 1 |
| 62 | The Isolation/quarantine for suspected cases with negative RT-PCR (who had contact with confirmed patients or came from hot spots) | 21 | 8 | 1 | 1 | 1 |
| 63 | Guide-lines for community service (public transportation, food delivery, postal, volunteer services) | 26 | 6 |  |  |  |
| 64 | Protection of hospital at outpatient units | 24 | 6 | 2 |  |  |
| 65 | Protection of healthcare workers | 25 | 5 | 1 |  | 1 |
| 66 | Guide-lines for each type of health worker to prevent cross-transmission | 31 | 1 |  |  |  |
| 67 | Guidelines for performing aerosol generation | 25 | 5 | 2 |  |  |
| 68 | Guidelines regarding the reuse of masks/PPE for healthcare workers | 26 | 5 | 1 |  |  |
| 69 | Guidelines on disposal of dead bodies | 23 | 9 |  |  |  |
| 70 | Guidelines on disposal of dead bodies | 25 | 7 |  |  |  |

**Annex 1:** IDI-Guideline-scope and magnitude of the health and health service challenges


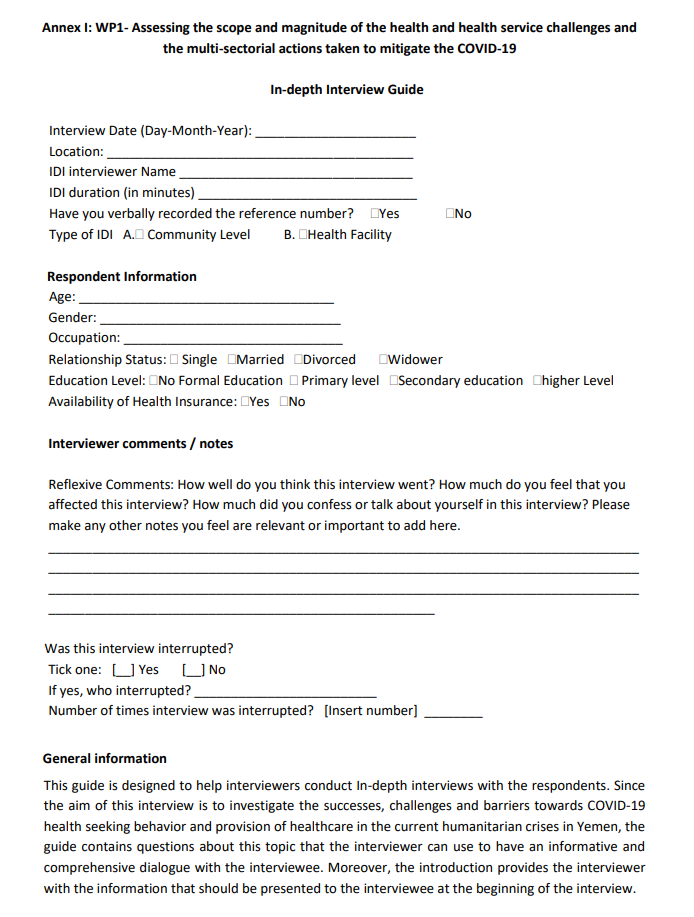


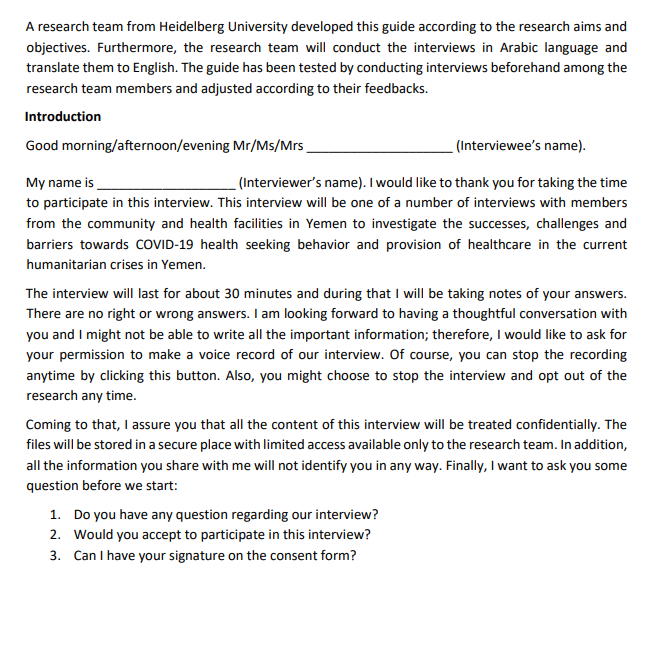


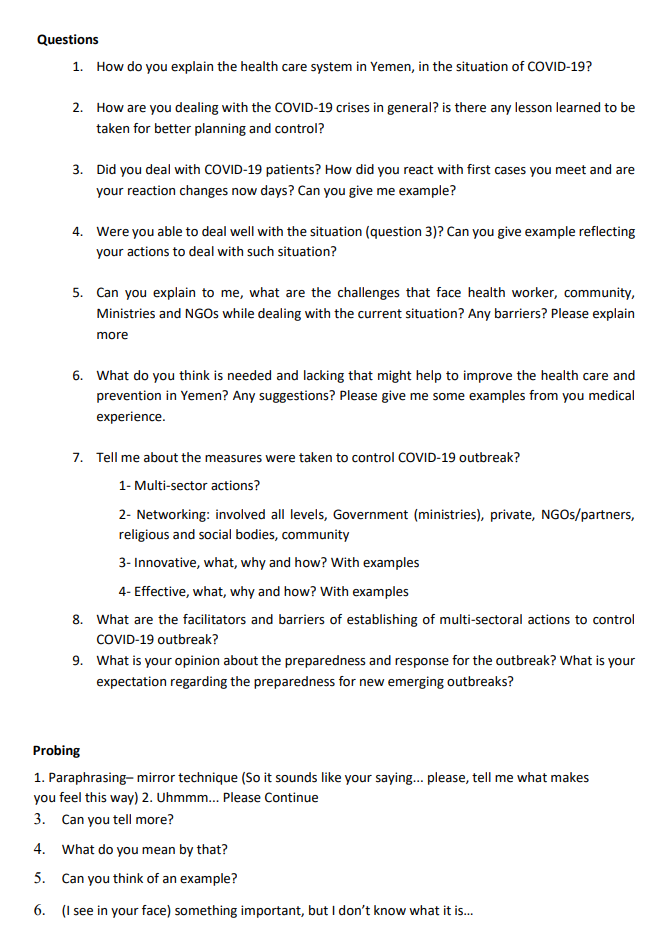


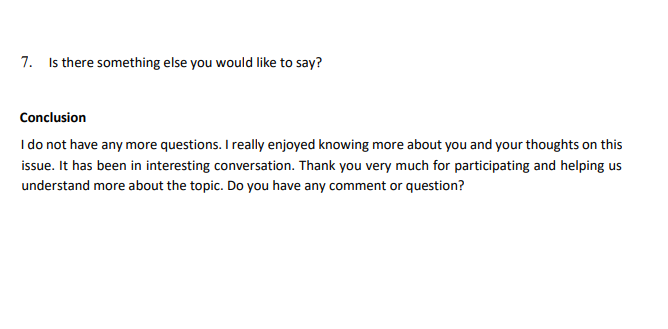
**Annex 2:** Checklist for COVID-19 mitigation


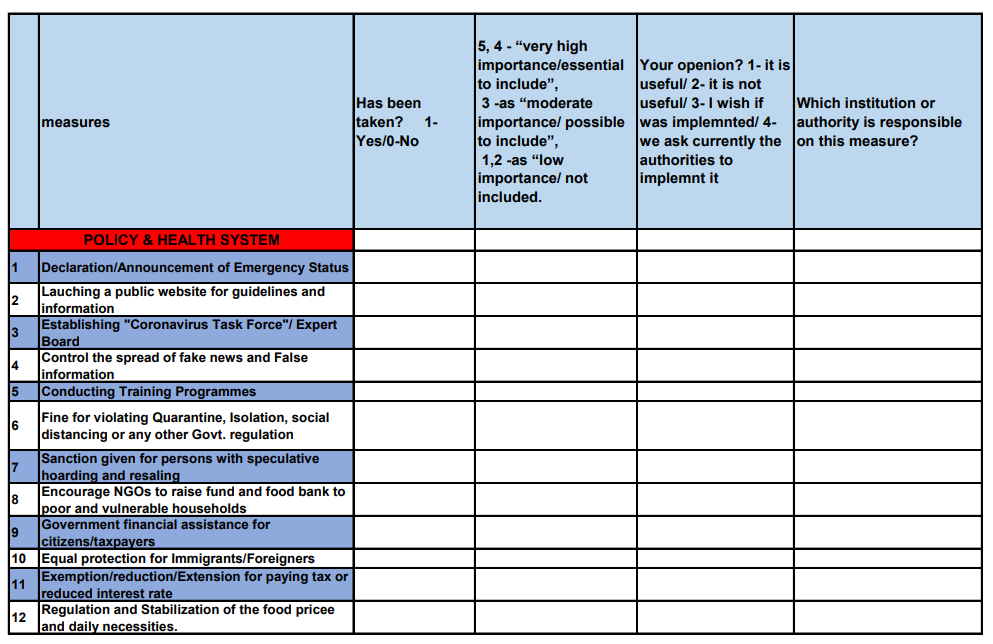


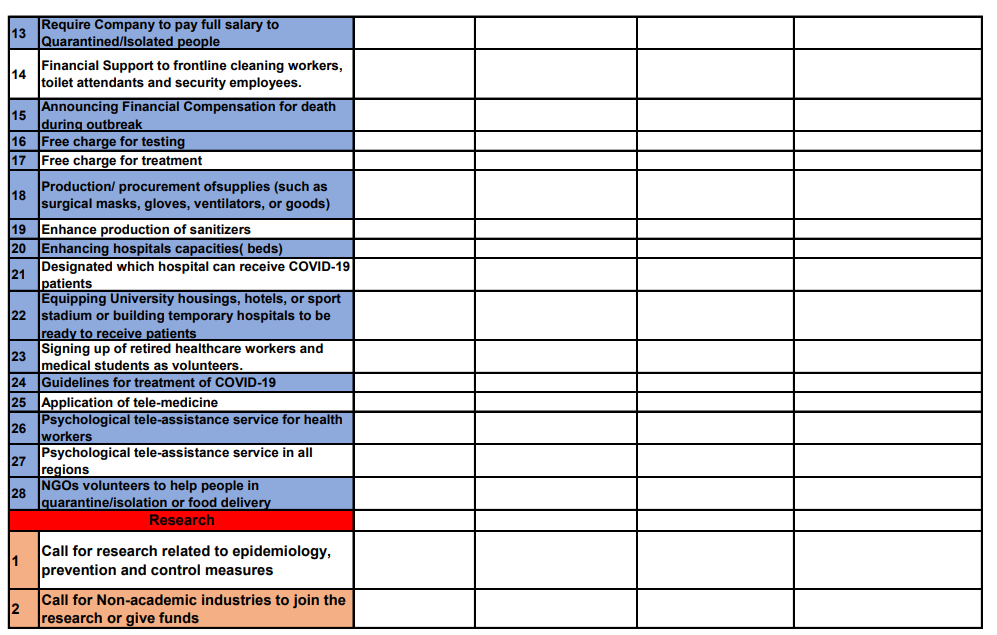


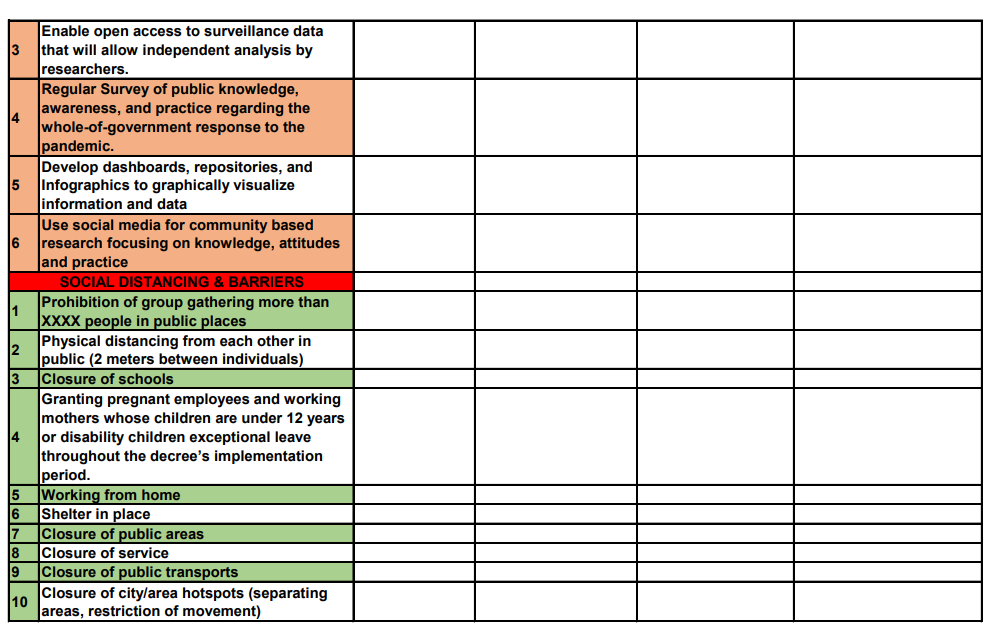


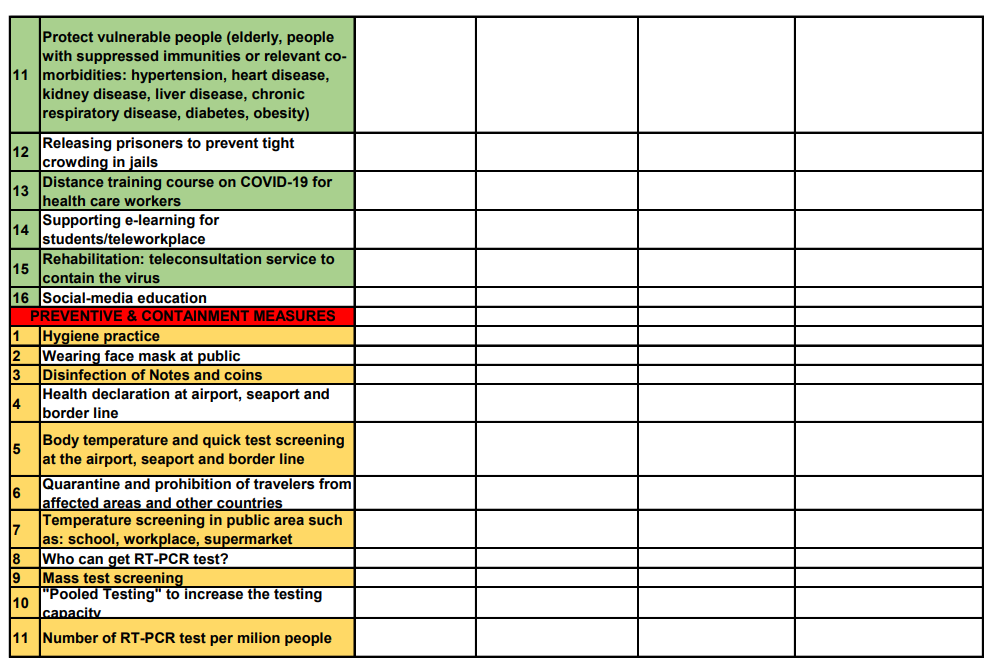


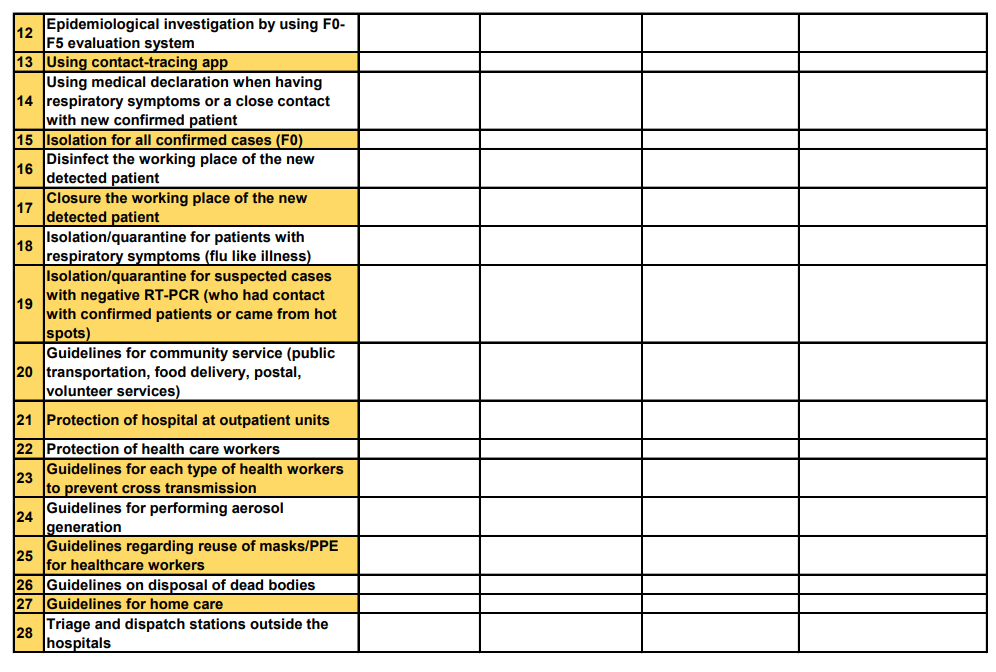

Supplement: Supplementary file 1 [file b4c363042de15ad59f2cf123.docx]
